# Supplementary material
Source: PubMed Central journal article supplement (PMC5663286)
Supplement: NIHMS870492-supplement-supplement_1.pdf [file NIHMS870492-supplement-supplement_1.pdf]

**Figure S4. Kernel Density Plots Before and After Matching**

Later Consultations—Initial Consultation  $\leq$  30 Days before Death

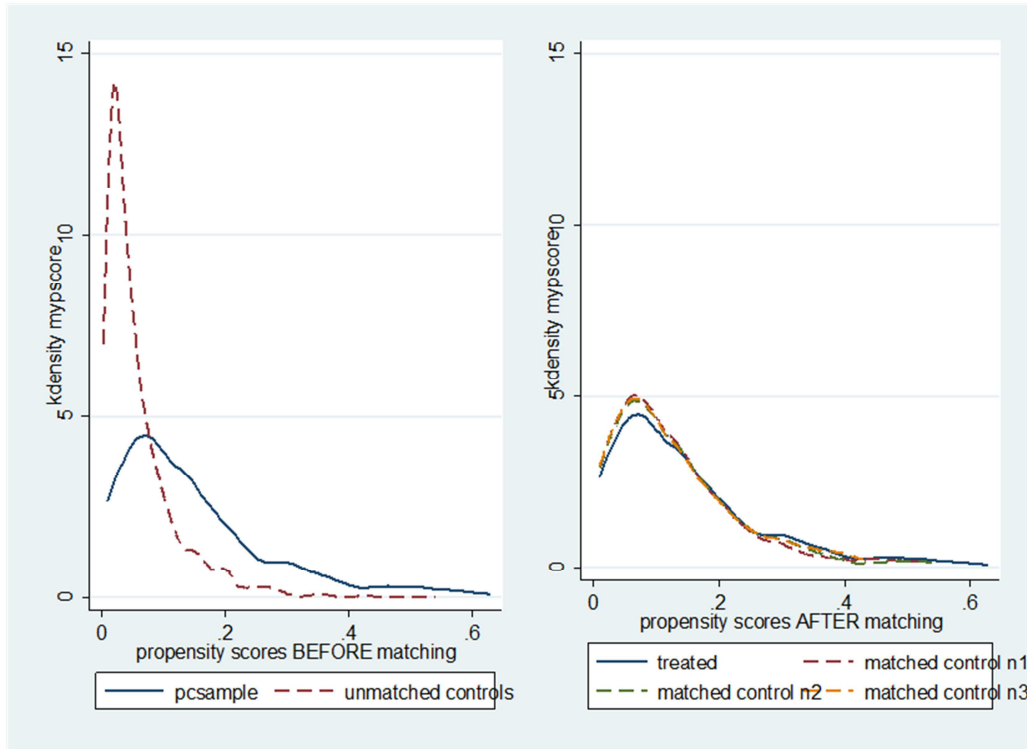

**Figure S5. Kernel Density Plots Before and After Matching**

*Later Consultations—Initial Consultation 31-180 Days before Death*

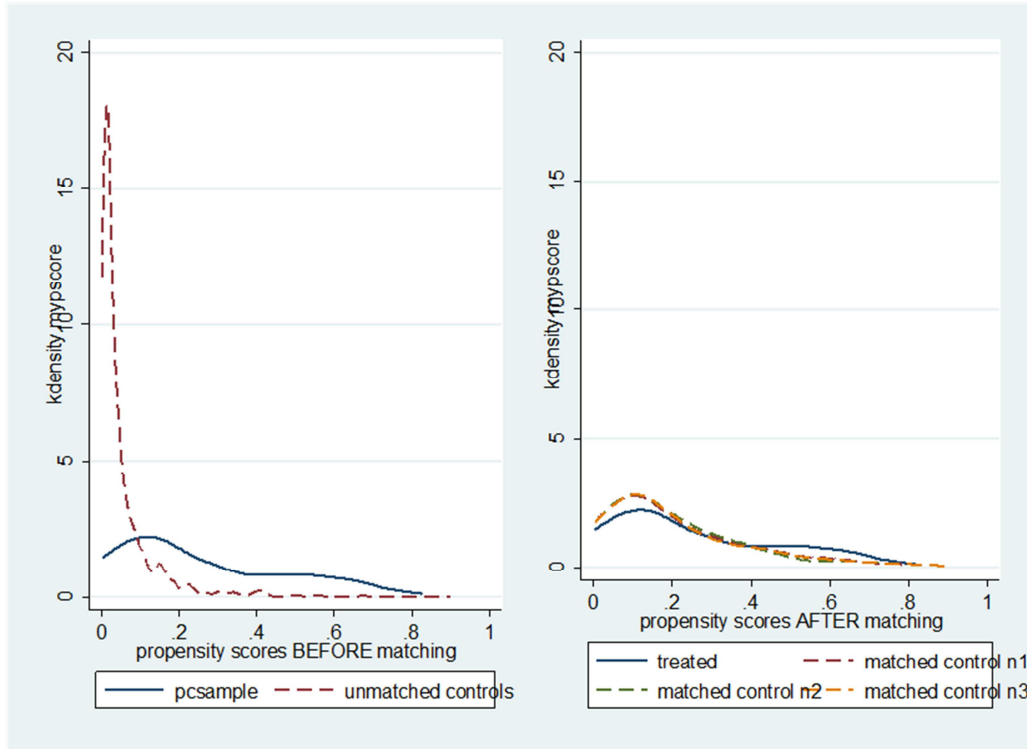

## Supplemental Digital Content

### Text, S.1

#### Propensity-Score Matching

##### Identifying Potential Controls

Recall from the paper that we looked separately at two groups of individuals (n=204) defined by the days from their first NH palliative care consultation to time of death: Earlier initial consultations (31-180 days before death) and later initial consultations (1-30 days before death). The median time between the initial palliative care consultations and the baseline MDS's chosen was 10 days among those with later consultations and 21 days among those with earlier consultations. We performed propensity score (pscore) matching procedures on these two groups separately. Specific steps are described below.

We selected our potential group of controls from the underlying populations of decedents at the 31 study NHs. We balanced potential bias versus efficiency associated with differing matching approaches by choosing 1-3 matching (to increase efficiency), using replacement (to decrease bias), and by requiring the propensity score of matches to be within a pre-prescribed caliper or range of the treatment individual's propensity score (to decrease bias). Like residents with NH palliative care consultations, all potential matches had to have dementia as defined in the main text. They had to have been Medicare eligible and not have used Medicare Advantage in the year prior to death, and had to have an available MDS from which to identify baseline characteristics. The dates on baseline MDSs were required to be of similar distances from death as observed for residents within the consultation groups. Specifically, for each of the two consultation groups we chose baseline MDSs for potential controls that were within the timeframes described below.

- Later initial consultations: MDS at least a day prior to death and closest to 30 days prior to death (before or after)

- Earlier initial consultations: An MDS at least 31 or more days prior to death and closest to 120 days before death (before or after)

Since this study focused on decedents with NH palliative care consultations up to 180 days before death, residents with first consultations more than 180 days before death were dropped altogether and not allowed to be potential controls. Potential controls who had NH hospice at baseline were retained so the controls would accurately represent the underlying population of decedents without palliative care consultations.(1) Between 19.8% – 26.3% of decedents within each group of potential controls had hospice prior to the baseline MDS. Relating to this, we included baseline variables known to be associated with both hospice election (e.g., the presence of DNR and DNH orders), and reflective of hospice enrollment (e.g., any hospitalizations in the 90 days prior to the baseline assessment) in all analyses. Still, this is a conservative approach and the effect of palliative care consultations would likely have potentially been higher had we removed potential controls with NH hospice at baseline.

#### Estimating Propensity-scores and Choosing Matches

Propensity scores for residents in each palliative care group and for potential controls were obtained as the predicted probability from logistic regression models where the receipt of palliative care consultations was the outcome. Tables S2 and S3 list the covariates used in the models, which are described in the paper. We selected patient and NH facility characteristics that have been found to be associated with hospice use and end-of-life acute care use.(2-6) We also included time between the baseline MDS and death, a state indicator, and year of death. Any resident with missing information on any of these covariates was excluded because of our inability to use their pscores for matching. To achieve balance within each pscore model, we tested numerous interactions between variables and variable transformations. We relied on Garrido and colleagues (7) for guidance in the process. Final pscore balanced models varied slightly across treatment groups. For example, among the later consultation group, a facility

level race variable was not included in the model, but a quadratic term for functional limitation status was. Stata pscore and psmatch2(8) procedures were used.

We used *k*-nearest neighbor with caliper pscore matching with replacement allowing for the possibility of ties to choose the three closest controls whose logit pscore fell within one-fifth of the standard deviation of the mean logit pscore for each consultation recipient.<sup>(9)</sup> A normalized weight was assigned to each treatment and match during Stata's psmatch2 procedure. This weight was later used in our outcome analyses. All non-matches were dropped from further analyses.

## References:

1. Breslow NE, Day NE. The Design and Analysis of Cohort Studies. Statistical Methods in Cancer Research. Vol II. Oxford, UK: International Agency for Research on Cancer; 1987: Available at: <http://www.iarc.fr/en/publications/pdfs-online/stat/sp82/SP82.pdf>.
2. Temel JS, Greer JA, Muzikansky A, et al. Early palliative care for patients with metastatic non-small-cell lung cancer. *N Engl J Med* 2010;363:733-742.
3. Gozalo PL, Miller SC. Hospice enrollment and evaluation of its causal effect on hospitalization of dying nursing home patients. *Health Serv Res* 2007;42:587-610.
4. Lepore MJ, Miller SC, Gozalo P. Hospice use among urban Black and White U.S. nursing home decedents in 2006. *Gerontologist* 2011;51:251-260.
5. Kelley AS, Deb P, Du Q, Aldridge Carlson MD, Morrison RS. Hospice enrollment saves money for Medicare and improves care quality across a number of different lengths-of-stay. *Health Aff (Millwood)* 2013;32:552-561.
6. Zheng NT, Mukamel DB, Friedman B, Caprio TV, Temkin-Greener H. The effect of hospice on hospitalizations of nursing home residents. *J Am Med Dir Assoc* 2015;16:155-159.
7. Garrido MM, Kelley AS, Paris J, et al. Methods for constructing and assessing propensity scores. *Health Serv Res* 2014;49:1701-1720.
8. Leuven E, Sianesi B. "PSMATCH2: Stata module to perform full Mahalanobis and propensity score matching, common support graphing, and covariate imbalance testing. <http://ideas.repec.org/c/boc/bocode/s432001.html>. Version 4.0.11.
9. Austin PC. An Introduction to Propensity Score Methods for Reducing the Effects of Confounding in Observational Studies. *Multivariate Behav Res* 2011;46:399-424.

**Table S2. Later Initial Palliative Care (PC) Consultations ( $\leq 30$  Days before Death): Pre- and Post-Match Comparisons**

| Characteristics                      | Later Initial Palliative Consultations        |                               |                                        | Standardized<br>% Differences<br>Consultation<br>vs. Matched<br>Controls |
|--------------------------------------|-----------------------------------------------|-------------------------------|----------------------------------------|--------------------------------------------------------------------------|
|                                      | Potential<br>Matches <sup>a</sup><br>(n=1586) | PC<br>Consultation<br>(n=112) | Matched, No<br>Consultation<br>(n=259) |                                                                          |
| <b>Palliative Care Consultations</b> | No                                            | Yes                           | No                                     |                                                                          |
| <b>Age at baseline</b>               |                                               |                               |                                        |                                                                          |
| 40 to 74                             | 6.1%                                          | 4.5%                          | 5.7%                                   | -5.3                                                                     |
| 75 to 79                             | 9.6%                                          | 16.1%                         | 16.1 %                                 | 0.0                                                                      |
| 79 to 84                             | 18.6%                                         | 25.0%                         | 26.2%                                  | -2.9                                                                     |
| 85 to 89                             | 26.4%                                         | 17.0%                         | 17.0%                                  | 0.0                                                                      |
| 90 to 94                             | 26.0%                                         | 28.6%                         | 27.1%                                  | 3.3                                                                      |
| 95 and older                         | 13.2%                                         | 8.9%                          | 8.0%                                   | 2.8                                                                      |
| <b>Male</b>                          | 33.2%                                         | 42.9%                         | 42.3%                                  | 1.2                                                                      |
| <b>Non-White</b>                     | 3.4%                                          | 6.3%                          | 7.7%                                   | -6.9                                                                     |
| <b>Married</b>                       | 23.6%                                         | 31.3%                         | 29.5%                                  | 4.0                                                                      |
| <b>Do-Not-Resuscitate Order</b>      | 80.0%                                         | 80.4%                         | 79.5%                                  | 2.2                                                                      |
| <b>Do-Not-Hospitalize Order</b>      | 16.1%                                         | 8.0%                          | 9.5%                                   | -4.6                                                                     |
| <b>Cancer</b>                        | 16.6%                                         | 19.6%                         | 22.3%                                  | -6.9                                                                     |
| <b>Cognitive Performance Scale</b>   |                                               |                               |                                        |                                                                          |
| Intact (0-2)                         | 58.3%                                         | 66.1%                         | 69.3%                                  | -6.8                                                                     |
| Mild/Moderate Impairment (3-4)       | 20.0%                                         | 21.4%                         | 19.0%                                  | 5.9                                                                      |
| Severe Impairment (5-6)              | 21.8%                                         | 12.5%                         | 11.6%                                  | 2.4                                                                      |
| <b>ADL score<sup>b</sup></b>         | 21.82                                         | 20.98                         | 21.06                                  | -1.4                                                                     |

| <b>Later Initial Palliative Consultations</b>                            |                                                       |                                        |                                                 |                                                                    |
|--------------------------------------------------------------------------|-------------------------------------------------------|----------------------------------------|-------------------------------------------------|--------------------------------------------------------------------|
| <b>Characteristics</b>                                                   | <b>Potential<br/>Matches<sup>a</sup><br/>(n=1586)</b> | <b>PC<br/>Consultation<br/>(n=112)</b> | <b>Matched, No<br/>Consultation<br/>(n=259)</b> | <b>Standardized</b>                                                |
|                                                                          |                                                       |                                        |                                                 | <b>% Differences<br/>Consultation<br/>vs. Matched<br/>Controls</b> |
| <b>ADL score squared</b>                                                 | 506.02                                                | 470.93                                 | 473.56                                          | -1.3                                                               |
| <b>Short NH Stay (&lt;90 days)</b>                                       | 25.1%                                                 | 40.2%                                  | 40.8                                            | -1.3                                                               |
| <b>Cognitive/ADL change<sup>c</sup></b>                                  | 73.9%                                                 | 78.6%                                  | 77.1%                                           | 3.5                                                                |
| <b>Days between MDS and death</b>                                        |                                                       |                                        |                                                 |                                                                    |
| <b>0 to 30 days</b>                                                      | 41.1%                                                 | 54.5%                                  | 55.4%                                           | -1.8                                                               |
| <b>31 to 60 days</b>                                                     | 34.3%                                                 | 24.1%                                  | 25.3%                                           | -2.6                                                               |
| <b>61 to 90 days</b>                                                     | 20.2%                                                 | 12.5%                                  | 11.0%                                           | 4.0                                                                |
| <b>91 to 180 days</b>                                                    | 4.4%                                                  | 8.9%                                   | 8.3%                                            | 2.4                                                                |
| <b>Any hospitalizations in 90 day prior<br/>to baseline</b>              | 31.4%                                                 | 51.8%                                  | 52.4%                                           | -1.2                                                               |
| <b>NH and Other Characteristics</b>                                      |                                                       |                                        |                                                 |                                                                    |
| <b>% Medicaid NH residents</b>                                           | 60.3%                                                 | 59.5%                                  | 61.1%                                           | -8.4                                                               |
| <b>% Medicare NH residents</b>                                           | 1.3%                                                  | 1.5%                                   | 1.5%                                            | 1.1                                                                |
| <b>Any Alzheimer's Unit</b>                                              | 36.2%                                                 | 33.0%                                  | 32.7                                            | 0.6                                                                |
| <b>% Dementia Over Median</b>                                            | 51.9%                                                 | 57.1%                                  | 56.8%                                           | 0.6                                                                |
| <b>Average casemix (RUGS) score*100</b>                                  | 81.12                                                 | 84.14                                  | 83.94                                           | 2.8                                                                |
| <b>Multisite facility (chain)</b>                                        | 63.7 %                                                | 79.5%                                  | 75.9%                                           | 8.0                                                                |
| <b>For-profit facility</b>                                               | 75.2%                                                 | 80.4%                                  | 80.7%                                           | -0.7                                                               |
| <b>Any NP/PA</b>                                                         | 40.6%                                                 | 56.3%                                  | 57.1%                                           | -1.8                                                               |
| <b>Distance between facility and<br/>closest hospital (miles) (mean)</b> | 3.33                                                  | 2.72                                   | 2.55                                            | 6.7                                                                |



| <b>Later Initial Palliative Consultations</b>                        |                                                       |                                        |                                                 |                                                                    |
|----------------------------------------------------------------------|-------------------------------------------------------|----------------------------------------|-------------------------------------------------|--------------------------------------------------------------------|
| <b>Characteristics</b>                                               | <b>Potential<br/>Matches<sup>a</sup><br/>(n=1586)</b> | <b>PC<br/>Consultation<br/>(n=112)</b> | <b>Matched, No<br/>Consultation<br/>(n=259)</b> | <b>Standardized</b>                                                |
|                                                                      |                                                       |                                        |                                                 | <b>% Differences<br/>Consultation<br/>vs. Matched<br/>Controls</b> |
| <b>Rhode Island</b>                                                  | 62.0%                                                 | 34.8%                                  | 34.8%                                           | 0.0                                                                |
| <b>Year of Death</b>                                                 |                                                       |                                        |                                                 |                                                                    |
| <b>2006</b>                                                          | 24.8%                                                 | 21.4%                                  | 22.0%                                           | -1.4                                                               |
| <b>2007</b>                                                          | 24.5%                                                 | 25.0%                                  | 22.6%                                           | 5.5                                                                |
| <b>2008</b>                                                          | 20.4%                                                 | 24.1%                                  | 23.5%                                           | 1.4                                                                |
| <b>2009</b>                                                          | 17.0%                                                 | 21.4%                                  | 22.9%                                           | -3.8                                                               |
| <b>2010</b>                                                          | 13.4%                                                 | 8.0%                                   | 8.9%                                            | -2.9                                                               |
| <b>Summaries</b>                                                     |                                                       |                                        |                                                 |                                                                    |
| <b>Mean Standardized Differences<br/>compared to treatment group</b> | 18.4                                                  |                                        | 3.1                                             |                                                                    |

Abbreviations: ADL, activities of daily living; MDS, minimum data set; NH, nursing home; NP, nurse practitioners; PA, physician assistants; RUGS, resource utilization groups

<sup>a</sup> Residents who died in the same study years and nursing homes and had the requisite Minimum Data Set assessment

<sup>b</sup> ADL score ranges from 0-28 where 0=independent and 28=totally dependent.

<sup>c</sup> Cognitive/ADL change represents unstable, worsening, or declining status.

**Table S3. Earlier Initial Palliative Care (PC) Consultations (31 to 180 Days before Death): Pre- and Post-Match Comparisons**

| Characteristics                          | Earlier Initial Palliative Consultations      |                              |                                        | Standardized<br>% Differences<br>Consultation<br>vs. Matched<br>Controls |
|------------------------------------------|-----------------------------------------------|------------------------------|----------------------------------------|--------------------------------------------------------------------------|
|                                          | Potential<br>Matches <sup>a</sup><br>(n=1170) | PC<br>Consultation<br>(n=91) | Matched, No<br>Consultation<br>(n=170) |                                                                          |
| <b>Palliative Care Consultation</b>      | No                                            | Yes                          | No                                     |                                                                          |
| <b>Age at baseline</b>                   |                                               |                              |                                        |                                                                          |
| 40 to 74                                 | 5.6%                                          | 15.4%                        | 14.7%                                  | 2.4                                                                      |
| 75 to 79                                 | 8.5%                                          | 11.0%                        | 15.4%                                  | -14.8                                                                    |
| 79 to 84                                 | 19.2%                                         | 27.5%                        | 27.5%                                  | 0.0                                                                      |
| 85 to 89                                 | 27.0%                                         | 23.1%                        | 22.0%                                  | 2.5                                                                      |
| 90 to 94                                 | 25.7%                                         | 16.5%                        | 14.3%                                  | 5.4                                                                      |
| 95 and older                             | 13.9%                                         | 6.6%                         | 6.2%                                   | 1.2                                                                      |
| <b>Male</b>                              | 29.1%                                         | 33.0%                        | 30.0%                                  | 6.3                                                                      |
| <b>Non-White</b>                         | 3.6%                                          | 7.7%                         | 8.1%                                   | -1.6                                                                     |
| <b>Married</b>                           | 21.7%                                         | 20.9%                        | 20.1%                                  | 1.8                                                                      |
| <b>Do-Not-Resuscitate Order</b>          | 81.3%                                         | 76.9%                        | 76.6%                                  | 0.9                                                                      |
| <b>Do-Not-Hospitalize Order</b>          | 12.6%                                         | 4.4%                         | 4.8%                                   | -1.3                                                                     |
| <b>Cancer</b>                            | 14.7%                                         | 9.9%                         | 11.4%                                  | -4.5                                                                     |
| <b>Cognitive Performance Scale</b>       |                                               |                              |                                        |                                                                          |
| Intact/Mild/Moderate Impairment<br>(0-4) | 67.4%                                         | 80.2%                        | 81.7%                                  | -3.4                                                                     |
| Severe Impairment (5-6)                  | 32.6%                                         | 19.8%                        | 18.3%                                  | 3.4                                                                      |
| <b>ADL score<sup>b</sup></b>             | 20.42                                         | 19.28                        | 19.00                                  | 4.6                                                                      |

**Earlier Initial Palliative Consultations**

| Characteristics                                                          | Potential<br>Matches <sup>a</sup><br>(n=1170) | PC<br>Consultation<br>(n=91) | Matched No<br>Consultation<br>(n=170) | Standardized                                             |
|--------------------------------------------------------------------------|-----------------------------------------------|------------------------------|---------------------------------------|----------------------------------------------------------|
|                                                                          |                                               |                              |                                       | % Differences<br>Consultation<br>vs. Matched<br>Controls |
| <b>Short NH Stay (&lt;90 days)</b>                                       | 13.6%                                         | 11.0%                        | 11.0%                                 | 0                                                        |
| <b>Cognitive/ADL change<sup>c</sup></b>                                  | 69.3 %                                        | 84.6%                        | 85.0%                                 | -0.9                                                     |
| <b>Days between MDS and death</b>                                        |                                               |                              |                                       |                                                          |
| <b>≤ 90 days</b>                                                         | 24.0%                                         | 37.4%                        | 37.0%                                 | 0.8                                                      |
| <b>91 to 120 days</b>                                                    | 33.2%                                         | 14.3%                        | 17.6%                                 | -7.9                                                     |
| <b>121 to 160 days</b>                                                   | 38.4%                                         | 23.1%                        | 23.8%                                 | -1.6                                                     |
| <b>161 to 301 days</b>                                                   | 4.4%                                          | 25.3%                        | 21.6%                                 | 10.7                                                     |
| <b>Any hospitalizations in 90 day prior<br/>to baseline</b>              | 28.1%                                         | 52.7%                        | 55.7%                                 | -6.1                                                     |
| <b>NH and Other Characteristics</b>                                      |                                               |                              |                                       |                                                          |
| <b>% Medicaid NH residents</b>                                           | 60.7%                                         | 58.7%                        | 59.7%                                 | -5.1                                                     |
| <b>% Medicare NH residents</b>                                           | 13.1%                                         | 15.7%                        | 16.2%                                 | -5.1                                                     |
| <b>% non-White NH residents</b>                                          | 5.8%                                          | 10.4%                        | 11.4%                                 | -12.8                                                    |
| <b>% Dementia Over Median</b>                                            | 51.9%                                         | 46.2%                        | 45.1%                                 | 2.2                                                      |
| <b>Any Alzheimer's Unit</b>                                              | 47.1%                                         | 39.6%                        | 36.6%                                 | 0.0                                                      |
| <b>Average casemix (RUGS) score*100</b>                                  | 80.73                                         | 83.55                        | 83.47                                 | 1.2                                                      |
| <b>Multisite facility (chain)</b>                                        | 60.4%                                         | 81.3%                        | 83.9%                                 | -5.8                                                     |
| <b>For-profit facility</b>                                               | 69.0%                                         | 83.5%                        | 82.8%                                 | 1.7                                                      |
| <b>Any NP/PA</b>                                                         | 42.2%                                         | 59.3%                        | 63.7%                                 | -8.9                                                     |
| <b>Distance between facility and<br/>closest hospital (miles) (mean)</b> | 2.78                                          | 2.79                         | 2.77                                  | 0.5                                                      |

| <b>Earlier Initial Palliative Care Consultations</b> |                  |               |                    |                       |
|------------------------------------------------------|------------------|---------------|--------------------|-----------------------|
| <b>Characteristics</b>                               | <b>Potential</b> | <b>PC</b>     | <b>Matched, No</b> | <b>Standardized %</b> |
|                                                      | <b>Matches</b>   |               |                    | <b>Consultation</b>   |
|                                                      | <sup>a</sup>     |               |                    | <b>Consultation</b>   |
|                                                      | <b>(n=1170)</b>  | <b>(n=91)</b> | <b>(n=170)</b>     | <b>vs. Matched</b>    |
|                                                      |                  |               |                    | <b>Controls</b>       |
| <b>Rhode Island</b>                                  | 56.5%            | 28.6%         | 25.3%              | 6.9                   |
| <b>Year of Death</b>                                 |                  |               |                    |                       |
| <b>2006-2007</b>                                     | 46.9%            | 42.9%         | 41.8%              | 2.2                   |
| <b>2008-2010</b>                                     | 53.1%            | 57.1%         | 58.2%              | -2.2                  |
| <b>Summaries</b>                                     |                  |               |                    |                       |
| <b>Mean Standardized Differences</b>                 | 25.6             |               | 3.9                |                       |
| <b>compared to treatment group</b>                   |                  |               |                    |                       |

Abbreviations: ADL, activities of daily living; MDS, minimum data set; NH, nursing home; NP, nurse practitioners; PA, physician assistants; RUGS, resource utilization groups

<sup>a</sup> Residents who died in the same study years and nursing homes and had the requisite Minimum Data Set assessment

<sup>b</sup> ADL score ranges from 0-28 where 0=independent and 28=totally dependent.

<sup>c</sup> Cognitive/ADL change represents unstable, worsening, or declining status.
